1 **Dietary Iron Intake and Mental and Behavioral Disorders**  
2 **Due to Use of Tobacco: A Cross-Sectional and Longitudinal**  
3 **Study Based on the UK Biobank**

4

5 Xueting Qi<sup>1</sup>, Ronghui Zhang<sup>1</sup>, Hailong Zhu<sup>1</sup>, Jia Luo<sup>1</sup>, Qiuge Zhang<sup>1</sup>,  
6 Weijing Wang<sup>1</sup>, Tong Wang<sup>1</sup>, Dongfeng Zhang<sup>1</sup>.

7

8 <sup>1</sup>: Department of Epidemiology and Health Statistics, the School of  
9 Public Health of Qingdao University, 308 Ningxia Road, Qingdao,  
10 Shandong 266071, People's Republic of China.

11

12 **Corresponding author:**

13 Dongfeng Zhang, Department of Epidemiology and Health Statistics, the  
14 School of Public Health of Qingdao University, 308 Ningxia Road,  
15 Qingdao, Shandong 266071, People's Republic of China.

16 Tel.: +8653282991712, Fax: +8653283801449, E-mail:  
17 [zhangdf1961@126.com](mailto:zhangdf1961@126.com)

18 Tong Wang, Department of Epidemiology and Health Statistics, the  
19 School of Public Health of Qingdao University, 308 Ningxia Road,  
20 Qingdao, Shandong 266071, People's Republic of China.

21 Tel.: +8653282991712, Fax: +8653283801449, E-mail:  
22 [wangtong0106@126.com](mailto:wangtong0106@126.com)

23

24

25

26 **ABSTRACT**

27 **Introduction:** Over 1 billion smokers worldwide, one-third of whom  
28 have mental and behavioral disorders, exist. However, factors influencing  
29 mental and behavioral disorders due to use of tobacco remain unexplored.  
30 We aim to investigate the relationship between dietary iron intake and  
31 mental and behavioral disorders due to use of tobacco.

32 **Methods:** Using large population cohort data from the UK Biobank, we  
33 employed logistic and Cox regression to explore the cross-sectional and  
34 longitudinal associations between dietary iron intake and mental and  
35 behavioral disorders due to use of tobacco. Additionally, we assessed the  
36 nonlinear relationship between dietary iron intake and mental and  
37 behavioral disorders due to use of tobacco using restricted cubic spline  
38 plots.

39 **Results:** The cross-sectional analysis included 50,991 participants. The  
40 logistic regression results indicated that dietary iron intake was negatively  
41 associated with mental and behavioral disorders due to use of tobacco. A  
42 total of 50,921 participants were included in the cohort study. The Cox  
43 regression results supported the protective effect of increased dietary iron  
44 intake against mental and behavioral disorders due to use of tobacco. The  
45 stratified and sensitivity analysis results were consistent with the main  
46 results. The restricted cubic spline plots showed a nonlinear relationship  
47 between dietary iron intake and mental and behavioral disorders due to  
48 use of tobacco. The risk reduction rate initially accelerated and then  
49 slowed in the total sample, the two age, and the male groups. In contrast,  
50 it declined rapidly at first and then leveled off in the female group.

51 **Conclusion:** This study found that dietary iron intake has a protective  
52 effect against mental and behavioral disorders due to use of tobacco,  
53 revealing a nonlinear association between the two. These findings offer

54 valuable insights for the prevention and treatment of mental and  
55 behavioral disorders due to use of tobacco in the future.

56

57 **Keywords:** Dietary iron, Tobacco, Mental and behavioral disorders, UK  
58 Biobank.

59

60 **What is already known on this topic**

61 Existing research primarily focuses on tobacco as a risk factor for  
62 physical diseases. In contrast, the factors influencing mental and  
63 behavioral disorders due to use of tobacco have not been adequately  
64 explored. Furthermore, findings regarding the relationship between  
65 dietary iron intake and mental health in the general population are  
66 inconsistent, highlighting the need for this study to clarify the potential  
67 association between dietary iron intake and mental and behavioral  
68 disorders due to use of tobacco among smokers.

69 **What this study adds**

70 In this combined cross-sectional and longitudinal study, we assessed the  
71 association between dietary iron intake and mental and behavioral  
72 disorders due to use of tobacco using data from UK Biobank. We found  
73 that high dietary iron intake was protective against mental and behavioral  
74 disorders due to use of tobacco. In the fully adjusted model, the OR (95%  
75 CI) and HR (95% CI) for the highest intake group compared to the lowest  
76 intake group were 0.41 (0.18 - 0.98) and 0.50 (0.43 - 0.58), respectively.  
77 In addition, we found a similar L-shaped nonlinear association between  
78 dietary iron intake and mental and behavioral disorders due to use of  
79 tobacco utilizing restricted cubic spline plots.

80 **How this study might affect research, practice or policy**

81 Our study provides evidence of a negative association between dietary  
82 iron intake and mental and behavioral disorders due to use of tobacco.  
83 For groups that find it difficult to quit smoking, increasing iron intake to  
84 an appropriate level may alleviate the discomfort associated with mental  
85 and behavioral disorders due to use of tobacco. National mental health is  
86 crucial for every country, and this becomes especially important in a  
87 modern context where mental stress is increasingly recognized.



## 89 **1 INTRODUCTION**

90 The tobacco epidemic is one of the greatest public health threats that the  
91 world has ever faced[1]. The clear realization that tobacco is a risk factor  
92 for a variety of diseases, including lung cancer, attracts the vast majority  
93 of attention[2-6]. However, mental and behavioral disorders due to use of  
94 tobacco have rarely been studied. Mental and behavioral disorders due to  
95 the use of tobacco refer to dependence syndrome, harmful use,  
96 withdrawal state, and acute intoxication, etc.[7]. These disorders are  
97 characterized by strong urges to smoke, inability to control cessation, and  
98 withdrawal symptoms such as frustration, anxiety, and irritability[8].  
99 There were more than 1 billion smokers worldwide in 2019, which is still  
100 increasing today[9]. According to the American Lung Association, 35%  
101 of smokers have behavioral health disorders[10]. Among those  
102 hospitalized for schizophrenia, depression, or bipolar disorder,  
103 approximately half of the deaths are due to smoking-related causes[11].  
104 Therefore, it is critical to identify and manage the influence factors for  
105 mental and behavioral disorders due to use of tobacco.

106 Tobacco use causes nicotine to bind to and activate acetylcholine  
107 receptors in the body, which results in dopamine release[12]. However,  
108 repeated exposure to nicotine leads to desensitization of these receptors,  
109 resulting in decreased dopamine release and contributing to mental and  
110 behavioral disorders[13]. Iron, an essential nutrient, is closely related to  
111 physical and mental health[14-18]. One of the physiological roles of iron  
112 is to promote dopaminergic signaling by enhancing the expression of the  
113 D2 neurotransmitter, increasing dopamine release[19]. Based on this, we  
114 hypothesize that there is an association between dietary iron intake with  
115 mental and behavioral disorders due to use of tobacco.

116 Many studies have currently reported connections between iron and

117 mental and behavioral disorders with inconsistent conclusions. For  
118 example, one study provided evidence of a negative correlation between  
119 circulating iron levels and depression and anxiety across different age and  
120 gender groups[20]. Similarly, another study found that dietary iron intake  
121 had a negative association with the risk of depression[21]. In contrast,  
122 one study indicated that excessive iron increased the risk of depression  
123 and anxiety[22]. Despite numerous investigations in the general  
124 population, there has been no research on the relationship between dietary  
125 iron intake and mental and behavioral disorders due to use of tobacco  
126 among smokers[23, 24].

127 Therefore, we conducted a cross-sectional and cohort study using data  
128 from the UK Biobank (UKB) to explore both the cross-sectional and  
129 longitudinal associations between dietary iron intake and mental and  
130 behavioral disorders due to use of tobacco. Additionally, we employed  
131 restricted cubic spline curves to clarify the dose-response relationship  
132 between dietary iron intake and mental and behavioral disorders due to  
133 use of tobacco.

134

135 **2 METHODS**

136 **2.1 Study participant and design**

137 The UKB is a large prospective population-based study that assessed  
138 approximately 500,000 participants at 22 assessment centers between  
139 2006 and 2010, including detailed health data, genomic information, and  
140 lifestyle data for each individual. These assessment centers covered  
141 various settings in the UK, ensuring a broad distribution of all exposures  
142 to detect reliable generalized associations between baseline  
143 characteristics and health outcomes. Additionally, the UKB was  
144 combined with UK national datasets for longitudinal follow-up of  
145 individual information. The study has received ethical approval from the  
146 North West Multi-Centre Research Ethics Committee in the UK  
147 (reference number: 11/NW/0382, 16/NW10274, 21/NW/0157), and all  
148 participants provided written informed consent. The specific filtering  
149 process is illustrated in Figure 1.

150



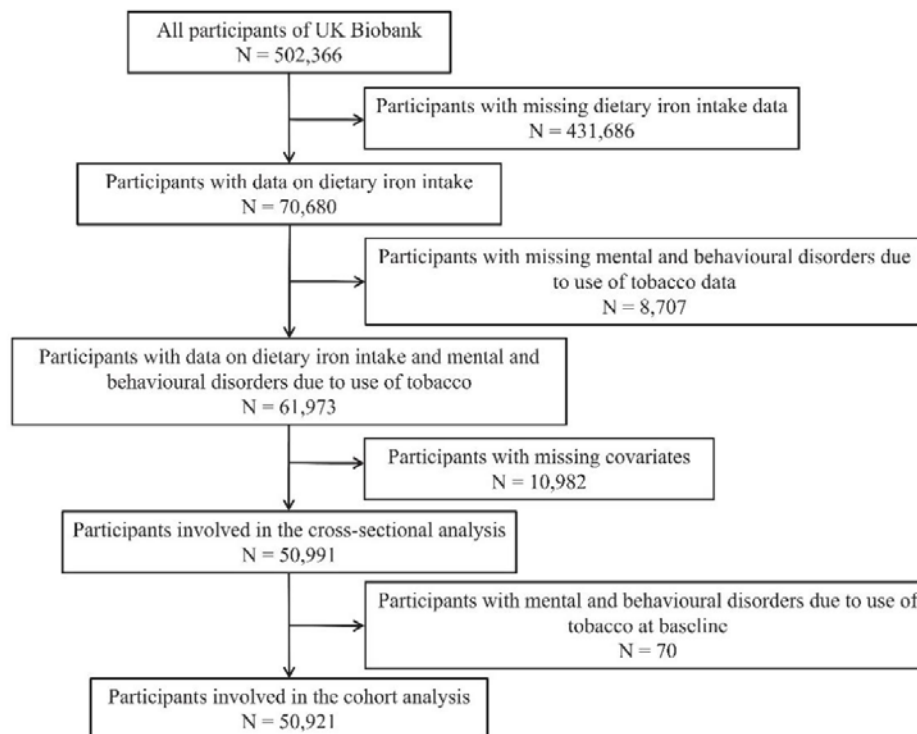

151

152

**Figure 1** Flow diagram of study participant selection.

153

## 154 **2.2 Exposure**

155 Between April 2009 and September 2010, participants' overall dietary  
156 intake information for the past 24 hours was collected at assessment  
157 centers in the UK using an online questionnaire called Oxford WebQ.  
158 This 24-hour dietary assessment tool is specifically designed for large  
159 prospective studies. It asks participants to provide dietary information  
160 using specified standard portion sizes within given food categories[25].  
161 Statistical data indicated that Oxford WebQ correlated with most nutrients  
162 equal to or greater than interviewer-administered dietary information[26].  
163 In the Oxford WebQ, the intake of food nutrients, including iron, was  
164 automatically calculated by multiplying the consumed portions by the  
165 predetermined quantity of each food and its corresponding nutrient  
166 content[27].

167

## 168 **2.3 Outcome**

169 The outcome of this study was mental and behavioral disorders due to use  
170 of tobacco, identified using the International Classification of Diseases,  
171 10th edition (ICD-10) codes. The outcome code was F17 in ICD-10,  
172 including F17.0 (acute intoxication), F17.1 (harmful use), F17.2  
173 (dependence syndrome), F17.3 (withdrawal state), F17.4 (withdrawal  
174 state with delirium), F17.7 (residual and late-onset psychotic disorder),  
175 F17.9 (unspecified mental and behavioral disorder), with more details  
176 available on the UKB website (<https://www.ukbiobank.ac.uk/>). New  
177 cases and the onset time were determined based on the first diagnosis  
178 recorded in the hospital inpatient database during the follow-up period.  
179 The date of death was obtained from the UK National Death Register.  
180 The follow-up period ended on the date of onset, date of death, date of  
181 loss to follow-up, or the date of observation termination (December 31,  
182 2022), with the earliest occurrence taking precedence.

183

## 184 **2.4 Covariates**

185 Based on previous research, the following factors were included as  
186 covariates in the study: age, sex (male, female), ethnicity (White, other),  
187 body mass index (BMI), physical activity level (low, moderate, high),  
188 energy intake, Townsend Deprivation Index (TDI), education  
189 qualifications ("college or university degree and other professional  
190 qualifications" were categorized as "College and above," while the  
191 remaining qualifications were categorized as "Below College"), alcohol  
192 consumption (never, previous, current), employment status ("employed in  
193 paid employment or self-employed" was categorized as "Full-time work",  
194 while the remaining categories were classified as "Non-full-time work"),  
195 hypertension (yes, no), stroke (yes, no), and diabetes (yes, no)[28-36].

196 Physical activity levels were classified based on Metabolic Equivalent  
197 Task (MET) score data derived from the International Physical Activity  
198 Questionnaire (IPAQ) guidelines[37].

199

## 200 **2.5 Statistical analysis**

201 In descriptive studies, continuous variables were described by mean and  
202 standard deviation (SD) and categorical variables by numbers (N) and  
203 percentages (%). Dietary iron intake was divided into four quartiles (Q1:  
204 <25th percentile, Q2: 25th to 50th percentile, Q3: 50th to 75th percentile,  
205 and Q4: >75th percentile), with the lowest quartile as the reference group.

206 In cross-sectional studies, logistic regression models were employed to  
207 estimate the association between dietary iron intake and mental and  
208 behavioral disorders due to use of tobacco. Results were reported as odds  
209 ratios (OR) and 95% confidence intervals (CI).

210 In the cohort study, the Cox proportional hazards model was used to  
211 assess the longitudinal associations between dietary iron intake and  
212 mental and behavioral disorders due to use of tobacco. The time scale  
213 was the follow-up duration from baseline to the occurrence of outcomes,  
214 death, loss to follow-up, or the end of observation (whichever occurred  
215 first, measured in days). Results were reported as hazard ratios (HR) with  
216 95%CI.

217 A total of four models were fitted in this study. Model 1 included no  
218 covariates. Model 2 adjusted for age, sex, ethnicity, education  
219 qualifications, employment status, and TDI. Model 3 further adjusted for  
220 BMI, physical activity level, energy intake, and alcohol consumption.  
221 Model 4 was additionally adjusted for hypertension, diabetes, and stroke.

222 To further evaluate the robustness of the cohort analysis results, we  
223 conducted the following sensitivity analyses: (1) Considering the chronic

224 and long-term nature of the effects of dietary factors on mental and  
225 behavioral disorders in the cohort analysis, we excluded participants  
226 diagnosed with mental and behavioral disorders due to use of tobacco in  
227 the 2 years prior to follow-up. (2) Given the strong association between  
228 sleep and mental health, we adjusted for sleep duration[38]. (3)  
229 Participants with extreme iron intake were excluded (intake < first  
230 percentile and > ninety-ninth percentile). (4) Participants with a history of  
231 hypertension, diabetes, or stroke at baseline were excluded. Moreover,  
232 stratified analyses were performed according to sex, age, and BMI, while  
233 the interaction was examined using a Wald test. Age was divided into two  
234 groups:  $\leq 60$  years and  $> 60$  years, and BMI was divided into four groups:  
235  $< 18.5 \text{ kg/m}^2$ ,  $\geq 18.5 \text{ kg/m}^2$  &  $< 25 \text{ kg/m}^2$ ,  $\geq 25 \text{ kg/m}^2$  &  $< 30 \text{ kg/m}^2$ ,  $\geq 30$   
236  $\text{kg/m}^2$ .

237 Additionally, we treated dietary iron intake as a continuous variable  
238 and employed restricted cubic splines to examine the dose-response  
239 relationship between dietary iron intake and mental and behavioral  
240 disorders due to use of tobacco. Considering the varying iron  
241 requirements based on age and sex, we investigated the dose-response  
242 relationships separately for different gender and age groups.

243 Statistical analyses were performed in R version 4.2.3, and a *P*-value <  
244 0.05 for a two-sided test was considered statistically significant.

245

246 **3 RESULTS**

247 **3.1 Participant baseline characteristics**

248 The cross-sectional analysis included 50,991 participants and a total of  
249 50,921 participants were included in the cohort study. The baseline  
250 characteristics of study participants grouped by dietary iron intake are  
251 shown in Table 1. Compared to participants with the lowest dietary iron  
252 intake, those with the highest intake were more likely to be male,  
253 non-full-time workers, and individuals with diabetes. They tended to have  
254 lower BMI and TDI while exhibiting higher levels of physical activity,  
255 energy intake, education qualifications, and alcohol consumption.

256

257

**Table 1** Baseline characteristics of the quartile of dietary iron intake.

| Characteristic                   | Dietary iron intake (mg/day) |                        |                         |                    | P for groups |
|----------------------------------|------------------------------|------------------------|-------------------------|--------------------|--------------|
|                                  | Q1<br>≤ 9.35                 | Q2<br>> 9.35 & ≤ 12.04 | Q3<br>> 12.04 & ≤ 15.10 | Q4<br>> 15.10      |              |
| Age (mean (SD))                  | 55.79 (8.24)                 | 56.55 (8.05)           | 56.70 (8.10)            | 56.58 (8.23)       | <0.001       |
| Sex (N (%))                      |                              |                        |                         |                    | <0.001       |
| Female                           | 8183 (64.28%)                | 7468 (58.66%)          | 6712 (52.73%)           | 5223 (41.03%)      |              |
| Male                             | 4548 (35.72%)                | 5262 (41.34%)          | 6018 (47.27%)           | 7507 (58.97%)      |              |
| Ethnicity (N (%))                |                              |                        |                         |                    | <0.001       |
| White                            | 11527 (90.54%)               | 12089 (94.96%)         | 12182 (95.7%)           | 12125 (95.25%)     |              |
| Other                            | 1204 (9.46%)                 | 641 (5.04%)            | 548 (4.3%)              | 605 (4.75%)        |              |
| BMI (mean (SD))                  | 27.50 (5.00)                 | 27.03 (4.64)           | 27.03 (4.61)            | 27.17 (4.66)       | <0.001       |
| Physical activity level (N (%))  |                              |                        |                         |                    | <0.001       |
| Low                              | 2550 (20.03%)                | 2229 (17.51%)          | 2052 (16.12%)           | 1915 (15.04%)      |              |
| Moderate                         | 5301 (41.64%)                | 5360 (42.11%)          | 5352 (42.04%)           | 5021 (39.44%)      |              |
| High                             | 4880 (38.33%)                | 5141 (40.38%)          | 5326 (41.84%)           | 5794 (45.51%)      |              |
| Energy intake (mean (SD))        | 6085.99 (1763.05)            | 7872.04 (1729.02)      | 9136.24 (1931.98)       | 11640.68 (3042.33) | <0.001       |
| TDI (mean (SD))                  | -1.04 (2.94)                 | -1.44 (2.74)           | -1.47 (2.74)            | -1.34 (2.79)       | <0.001       |
| Education qualifications (N (%)) |                              |                        |                         |                    | <0.001       |
| College and above                | 4980 (39.12%)                | 5672 (44.56%)          | 5917 (46.48%)           | 6203 (48.73%)      |              |
| Below College                    | 7751 (60.88%)                | 7058 (55.44%)          | 6813 (53.52%)           | 6527 (51.27%)      |              |
| Alcohol consumption (N (%))      |                              |                        |                         |                    | <0.001       |
| Never                            | 658 (5.17%)                  | 438 (3.44%)            | 400 (3.14%)             | 330 (2.59%)        |              |
| Previous                         | 594 (4.67%)                  | 424 (3.33%)            | 385 (3.02%)             | 393 (3.09%)        |              |
| Current                          | 11479 (90.17%)               | 11868 (93.23%)         | 11945 (93.83%)          | 12007 (94.32%)     |              |
| Employment status (N (%))        |                              |                        |                         |                    | <0.001       |

| Characteristic       | Dietary iron intake (mg/day) |                        |                         |                | P for groups |
|----------------------|------------------------------|------------------------|-------------------------|----------------|--------------|
|                      | Q1<br>≤ 9.35                 | Q2<br>> 9.35 & ≤ 12.04 | Q3<br>> 12.04 & ≤ 15.10 | Q4<br>> 15.10  |              |
| Full-time work       | 7610 (59.78%)                | 7445 (58.48%)          | 7268 (57.09%)           | 7232 (56.81%)  | 0.083        |
| Non-full-time work   | 5121 (40.22%)                | 5285 (41.52%)          | 5462 (42.91%)           | 5498 (43.19%)  |              |
| Hypertension (N (%)) |                              |                        |                         |                | 0.685        |
| Yes                  | 3662 (28.76%)                | 3621 (28.44%)          | 3628 (28.5%)            | 3784 (29.73%)  |              |
| No                   | 9069 (71.24%)                | 9109 (71.56%)          | 9102 (71.5%)            | 8946 (70.27%)  |              |
| Stroke (N (%))       |                              |                        |                         |                | 0.040        |
| Yes                  | 266 (2.09%)                  | 252 (1.98%)            | 256 (2.01%)             | 278 (2.18%)    |              |
| No                   | 12465 (97.91%)               | 12478 (98.02%)         | 12474 (97.99%)          | 12452 (97.82%) |              |
| Diabetes (N (%))     |                              |                        |                         |                | 0.040        |
| Yes                  | 685 (5.38%)                  | 641 (5.04%)            | 604 (4.74%)             | 692 (5.44%)    |              |
| No                   | 12046 (94.62%)               | 12089 (94.96%)         | 12126 (95.26%)          | 12038 (94.56%) |              |

Note: N: numbers, SD: standard deviation, BMI: body mass index, TDI: Townsend deprivation index.

### **3.2 Cross-sectional analysis**

At baseline, there were 70 patients with mental and behavioral disorders due to use of tobacco. The results of the cross-sectional analysis are displayed in Table 2. According to the results, all four models showed that dietary iron intake was negatively associated with mental and behavioral disorders due to use of tobacco. The model 4 (adjusted for age, sex, ethnicity, BMI, physical activity level, energy intake, TDI, education qualifications, alcohol consumption, employment status, hypertension, stroke, and diabetes) indicated that compared to the Q1 group, OR (95%CI) for the Q2, Q3, and Q4 groups were 0.42 (0.21 - 0.83), 0.26 (0.12 - 0.60), and 0.41 (0.18 - 0.98), respectively.



**Table 2** Association between dietary iron intake and mental and behavioral disorders due to use of tobacco in the cross-sectional study.

| Dietary iron intake | Model1             |                 | Model2             |                 | Model3             |                 | Model4             |                 |
|---------------------|--------------------|-----------------|--------------------|-----------------|--------------------|-----------------|--------------------|-----------------|
|                     | OR (95% CI)        | <i>P</i> -value | OR (95% CI)        | <i>P</i> -value | OR (95% CI)        | <i>P</i> -value | OR (95% CI)        | <i>P</i> -value |
| Q1                  | 1.00 (Ref.)        | Ref.            | 1.00 (Ref.)        | Ref.            | 1.00 (Ref.)        | Ref.            | 1.00 (Ref.)        | Ref.            |
| Q2                  | 0.42 (0.22 - 0.80) | <b>0.008</b>    | 0.44 (0.23 - 0.85) | <b>0.014</b>    | 0.42 (0.21 - 0.83) | <b>0.013</b>    | 0.42 (0.21 - 0.83) | <b>0.012</b>    |
| Q3                  | 0.29 (0.14 - 0.61) | <b>0.001</b>    | 0.29 (0.14 - 0.62) | <b>0.001</b>    | 0.27 (0.12 - 0.61) | <b>0.002</b>    | 0.26 (0.12 - 0.60) | <b>0.001</b>    |
| Q4                  | 0.55 (0.30 - 0.99) | <b>0.046</b>    | 0.51 (0.28 - 0.94) | <b>0.030</b>    | 0.43 (0.18 - 1.01) | 0.053           | 0.41 (0.18 - 0.98) | <b>0.044</b>    |

Note: Model 1 was not adjusted for covariates. Model 2 adjusted for age, sex, ethnicity, education qualifications, employment status, and TDI. Model 3 further adjusted for BMI, physical activity level, energy intake, and alcohol consumption. Model 4 further adjusted for hypertension, diabetes, and stroke.

### 3.3 Cohort analysis

During a median follow-up of 6.84 years, 1,404 new cases of mental and behavioral disorders due to use of tobacco were identified. The association between dietary iron intake and the risk of mental and behavioral disorders due to use of tobacco is presented in Table 3. The Cox proportional hazards model did not violate the proportional hazards assumption. According to the results, Model 4 indicated that the risk of mental and behavioral disorders due to use of tobacco was reduced in Q2 (HR: 0.60, 95%CI: 0.53 - 0.68,  $P$ : <0.001), Q3 (HR: 0.59, 95%CI: 0.52 - 0.67,  $P$ : <0.001), and Q4 (HR: 0.50, 95%CI: 0.43 - 0.58,  $P$ : <0.001) groups compared to the Q1 group, and this association was observed in Models 1, 2, and 3.

**Table 3** Longitudinal association between dietary iron intake and mental and behavioral disorders due to use of tobacco.

| Dietary iron intake | Model1             |                  | Model2             |                  | Model3             |                  | Model4             |                  |
|---------------------|--------------------|------------------|--------------------|------------------|--------------------|------------------|--------------------|------------------|
|                     | HR (95% CI)        | <i>P</i> -value  | HR (95% CI)        | <i>P</i> -value  | HR (95% CI)        | <i>P</i> -value  | HR (95% CI)        | <i>P</i> -value  |
| Q1                  | 1.00 (Ref.)        | Ref.             | 1.00 (Ref.)        | Ref.             | 1.00 (Ref.)        | Ref.             | 1.00 (Ref.)        | Ref.             |
| Q2                  | 0.60 (0.53 - 0.68) | <b>&lt;0.001</b> | 0.67 (0.59 - 0.75) | <b>&lt;0.001</b> | 0.60 (0.53 - 0.68) | <b>&lt;0.001</b> | 0.60 (0.53 - 0.68) | <b>&lt;0.001</b> |
| Q3                  | 0.59 (0.52 - 0.67) | <b>&lt;0.001</b> | 0.70 (0.63 - 0.79) | <b>&lt;0.001</b> | 0.59 (0.52 - 0.67) | <b>&lt;0.001</b> | 0.59 (0.52 - 0.67) | <b>&lt;0.001</b> |
| Q4                  | 0.50 (0.43 - 0.59) | <b>&lt;0.001</b> | 0.71 (0.63 - 0.79) | <b>&lt;0.001</b> | 0.50 (0.43 - 0.59) | <b>&lt;0.001</b> | 0.50 (0.43 - 0.58) | <b>&lt;0.001</b> |

Note: Model 1 was not adjusted for covariates. Model 2 adjusted for age, sex, ethnicity, education qualifications, employment status, and TDI. Model 3 further adjusted for BMI, physical activity level, energy intake, and alcohol consumption. Model 4 further adjusted for hypertension, diabetes, and stroke.

### 3.4 Stratified analysis

The stratified analysis results are shown in Supplementary Table 1. When stratified by age, both age groups resulted in a reduced risk of mental and behavioral disorders due to use of tobacco as dietary iron intake increased. In the  $\leq 60$  age group, the HR (95% CI) was 0.58 (0.50 - 0.67), 0.57 (0.49 - 0.67), and 0.45 (0.37 - 0.55) for the Q2, Q3, and Q4 groups, respectively, compared to the Q1 group. In the  $> 60$  age group, HR (95% CI) was 0.62 (0.51 - 0.76), 0.60 (0.49 - 0.75), and 0.56 (0.44 - 0.73) in Q2, Q3, and Q4 groups respectively compared to the Q1 group.

When analyzed by sex, the male and female results were consistent with the main analysis findings. In females, the HR (95% CI) for the Q2, Q3, and Q4 groups compared to the Q1 group were 0.63 (0.53 - 0.75), 0.60 (0.50 - 0.73), and 0.59 (0.47 - 0.75), respectively. In males, the HR (95% CI) for the Q2, Q3, and Q4 groups compared to the Q1 group were 0.58 (0.49 - 0.68), 0.58 (0.49 - 0.69), and 0.45 (0.37 - 0.55), respectively.

When stratifying by BMI, only the group with BMI  $< 18.5$  kg/m<sup>2</sup> did not yield statistically significant results. This might have been due to the small sample size of this subgroup (N = 263). In the group with BMI  $\geq 18.5$  kg/m<sup>2</sup> &  $< 25$  kg/m<sup>2</sup>, the HR (95% CI) for the Q2, Q3, and Q4 groups compared to the Q1 group were 0.50 (0.40 - 0.62), 0.47 (0.38 - 0.59), and 0.37 (0.29 - 0.49), respectively. In the group with BMI  $\geq 25$  kg/m<sup>2</sup> &  $< 30$  kg/m<sup>2</sup>, the HR (95% CI) for the Q2, Q3, and Q4 groups were 0.62 (0.51 - 0.74), 0.61 (0.50 - 0.74), and 0.50 (0.40 - 0.64), respectively. In the group with BMI  $\geq 30$  kg/m<sup>2</sup>, the HR (95% CI) for the Q2, Q3, and Q4 groups were 0.72 (0.57 - 0.90), 0.76 (0.59 - 0.97), and 0.68 (0.51 - 0.92), respectively.

Furthermore, no statistically significant differences were observed between the subgroups.

### 3.4 Sensitivity analysis

After excluding individuals diagnosed within the first two years of follow-up, the association between higher dietary iron intake and a lower risk of mental and behavioral disorders due to use of tobacco remained unchanged (Supplementary Table 2). In Model 4, groups Q2 (HR: 0.60, 95%CI: 0.53-0.68,  $P < 0.001$ ), Q3 (HR: 0.59, 95%CI: 0.52-0.67,  $P < 0.001$ ) and Q4 (HR: 0.52, 95%CI: 0.44-0.61,  $P < 0.001$ ) had reduced risk compared to group Q1.

Adjusting for sleep duration did not significantly change the main analysis results (Supplementary Table 3). In Model 4, compared to group Q1, the risk was reduced in Q2 (HR: 0.61, 95%CI: 0.54 - 0.68,  $P < 0.001$ ), Q3 (HR: 0.60, 95%CI: 0.53 - 0.67,  $P < 0.001$ ), and Q4 (HR: 0.51, 95%CI: 0.43 - 0.59,  $P < 0.001$ ) groups.

Additionally, after excluding participants with extreme dietary iron intake, the findings remained consistent with the main analysis (Supplementary Table 4). In Model 4, groups Q2 (HR: 0.62, 95%CI: 0.55-0.70,  $P < 0.001$ ), Q3 (HR: 0.60, 95%CI: 0.52-0.68,  $P < 0.001$ ) and Q4 (HR: 0.49, 95%CI: 0.42-0.57,  $P < 0.001$ ) had reduced risk compared to group Q1.

Finally, excluding participants with hypertension, stroke, and diabetes did not alter the association (Supplementary Table 5). In Model 3, compared to group Q1, the risk was reduced in Q2 (HR: 0.59, 95%CI: 0.51 - 0.68,  $P < 0.001$ ), Q3 (HR: 0.56, 95%CI: 0.48 - 0.65,  $P < 0.001$ ), and Q4 (HR: 0.47, 95%CI: 0.39 - 0.56,  $P < 0.001$ ) groups.

These sensitivity analysis results confirmed the robustness of the study findings.

### 3.6 Restricted cubic spline

The results of the restricted cubic spline analysis indicated a similar L-shaped nonlinear relationship between dietary iron intake and mental and behavioral disorders due to use of tobacco. As dietary iron intake increased, the risk of these disorders decreased. A significant risk reduction was observed when intake was approximately between 0 to 12 mg/day. However, the risk reduction rate slowed when the intake exceeded about 12 mg/day (Figure 2).

When stratified by age, the trend in risk changes was similar to what was previously described. The inflection point for the  $\leq 60$  years and the  $>60$  years groups was around 12 mg/day (Supplementary Figures 1a and 1b).

When stratified by sex, the trend in risk change for males followed a similar pattern to that previously described, with an inflection point at approximately 13 mg/day (Supplementary Figure 1c). In females, however, an L-shape was observed between dietary iron intake and mental and behavioral disorders due to use of tobacco. A significant risk reduction occurred when intake was around 0 to 11 mg/day. When intake exceeded approximately 11 mg/day, the risk reduction rate began to plateau (Supplementary Figure 1d).

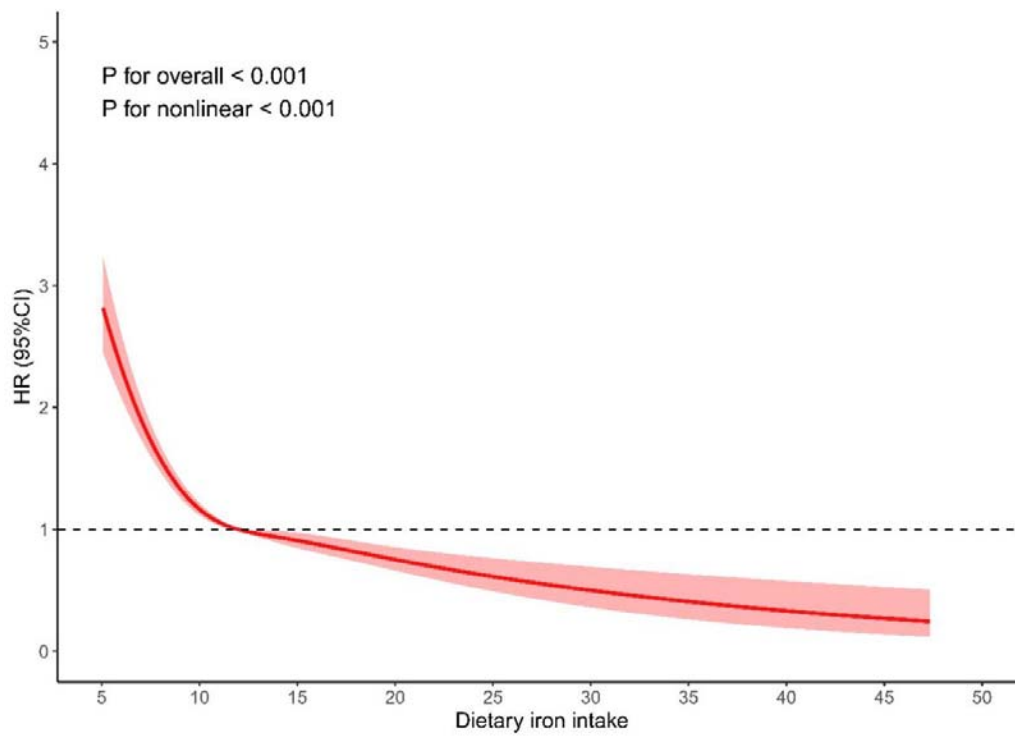

**Figure 2** Restricted cubic spline plots of dietary iron intake and mental and behavioral disorders due to use of tobacco.

## 4 DISCUSSION

In this study, we conducted logistic regression and Cox regression analyses based on the UKB population sample, finding that higher dietary iron intake was associated with a lower risk of mental and behavioral disorders due to use of tobacco. Stratified analysis results supported the protective effect of dietary iron intake on mental and behavioral disorders due to use of tobacco. The sensitivity analysis results were consistent with the main analysis results. Additionally, the restricted cubic spline analysis revealed a nonlinear relationship between dietary iron intake and mental and behavioral disorders due to use of tobacco. In the overall population, both age groups and the male group, the risk of increasing dietary iron intake initially decreased rapidly before slowing down. For females, the trend in risk change was characterized by a rapid initial decline followed by stabilization.

In this study, we observed that higher dietary iron intake was associated with a reduced risk of mental and behavioral disorders due to use of tobacco. Although there is no epidemiological evidence linking dietary iron intake to mental and behavioral disorders due to use of tobacco, a large number of previous studies have explored the relationship between iron and mental and behavioral disorders. It is evident that mental and behavioral disorders due to use of tobacco are a subset of this broader category. For example, one clinical study found that iron deficiency significantly increased the risk of both psychiatric comorbidity and individual psychiatric disorders[39]. Results from another study supported the association of iron deficiency with depressive symptoms[40]. A clinical study revealed that low iron levels were associated with a significantly higher risk of developing mental disorders[41]. In addition, animal experiments found that rats fed an



iron-deficient diet exhibited more anxiety-like behaviors than control rats, supporting the findings of observational studies in humans[42]. These findings supported our results to some extent.

Mental and behavioral disorders due to use of tobacco are primarily driven by nicotine dependence[43]. Nicotine is a sympathomimetic stimulant that binds to nicotinic acetylcholine receptors in the brain[44, 45]. It releases dopamine and other neurotransmitters, such as norepinephrine, which induce feelings of pleasure[46]. Repeated exposure to nicotine increases the number of nicotinic acetylcholine receptors, altering the brain's reward system and raising the threshold for pleasure[46, 47]. When these receptors are not bound to nicotine, individuals may experience mental and behavioral disorders such as inattention, restlessness, and irritability[43]. Iron plays a crucial role in the synthesis and release of dopamine. On the one hand, iron can increase dopamine release by promoting the work of dopamine transporter proteins[48]. On the other hand, iron can enhance dopaminergic signaling by increasing the affinity and expression of D2 neurotransmitters[49]. In addition, iron is an essential cofactor for tyrosine hydroxylase, the rate-limiting enzyme in dopamine synthesis[50]. Sufficient iron levels can enhance tyrosine hydroxylase activity, thereby increasing dopamine production and alleviating mental disorders[51].

This study had several strengths. Firstly, it represented the first exploration of the association between dietary iron intake and mental and behavioral disorders due to use of tobacco. In addition, we explored the L-shaped and similar L-shape association between dietary iron intake and mental and behavioral disorders due to use of tobacco using restricted cubic spline plots. Secondly, we combined both cross-sectional and longitudinal studies, verifying the results from the cross-sectional

analysis with cohort studies to ensure reliability. Thirdly, we utilized a large population cohort from the UKB, enhancing the representativeness of our sample. Finally, we comprehensively included various covariates and conducted multiple sensitivity and stratified analyses to assess the robustness of our findings.

We acknowledged several limitations. Firstly, dietary iron intake information was obtained from participants' online questionnaires, which might introduce recall bias. Secondly, the prolonged data collection period of the UKB prevented us from distinguishing the effects of short-term versus long-term dietary iron intake on mental and behavioral disorders due to use of tobacco. Thirdly, the study was ultimately observational, preventing us from drawing causal conclusions. Lastly, although we had attempted to adjust for numerous confounding factors, the influence of unknown factors may persist.

## 5. CONCLUSION

In conclusion, we found a stable, protective effect of dietary iron intake against mental and behavioral disorders due to use of tobacco and a nonlinear relationship between dietary iron intake and mental and behavioral disorders due to use of tobacco. Our findings may provide valuable insights into how individuals can reduce mental and behavioral disorders due to use of tobacco by appropriately increasing dietary iron intake. Meanwhile, it offers reliable clues for future public health policy development.

## **Acknowledgments**

We thank all the staff at the UKB. This research has been conducted using the UKB Resource under Application Number 95715

## **Contributors**

XQ contributed to the conception, design, acquisition and interpretation of data, performed all statistical analyses and drafted and critically revised the manuscript. RZ, QZ, and JL contributed to the design, analysis and interpretation of results. TW and WW contributed to analysis and interpretation of results and critically revised the manuscript. HZ makes critical revisions to important intellectual content. DZ contributed to the conception, design and acquisition of data and critically revised the manuscript. All authors gave their final approval and agreed to be accountable for all aspects of the work.

## **Funding**

Not applicable.

## **Competing interests**

The authors declare no conflicts of interest.

## **Patient consent for publication**

Not required.

### **Ethics approval**

Ethical review for this study was obtained from the North West

Multi-Centre Research Ethics Committee in the UK (reference number:

11/NW/0382, 16/NW10274, 21/NW/0157).

### **Data availability statement**

The data supporting the findings of this study are publicly available at

UK Biobank (<https://www.ukbiobank.ac.uk>).

## References

1. Xiao D, Wang C Tobacco dependence should be recognised as a lethal non-communicable disease. *BMJ (Clinical research ed)*. 2019;365:l2204. doi: 10.1136/bmj.l2204
2. Leiter A, Veluswamy RR, Wisnivesky JPT The global burden of lung cancer: current status and future trends. *Nature reviews Clinical oncology*. 2023;20:624-39. doi: 10.1038/s41571-023-00798-3
3. Padrão E, Oliveira O, Felgueiras Ó, et al Tuberculosis and tobacco: is there any epidemiological association? *The European respiratory journal*. 2018;51. doi: 10.1183/13993003.02121-2017
4. Chen J, Chen R, Xiang S, et al Cigarette smoking and schizophrenia: Mendelian randomisation study. *The British journal of psychiatry : the journal of mental science*. 2021;218:98-103. doi: 10.1192/bjp.2020.116
5. Joachim GE, Bohnert KM, As-Sanie S, et al Cannabis smoking, tobacco cigarette smoking, and adenomyosis risk. *Fertility and sterility*. 2023;119:838-46. doi: 10.1016/j.fertnstert.2023.01.035
6. Sargent JD, Halenar M, Steinberg AW, et al Childhood Cigarette Smoking and Risk of Chronic Obstructive Pulmonary Disease in Older U.S. Adults. *American journal of respiratory and critical care medicine*. 2023;208:428-34. doi: 10.1164/rccm.202303-0476OC
7. Organization WH. International Classification of Diseases, 10th edition (ICD-10) [online]. 2019. <https://icd.who.int/browse10/2019/en#> (accessed 25 October 2024).
8. Selby P, Zawertailo L Tobacco Addiction. *The New England journal of medicine*.

2022;387:345-54. doi: 10.1056/NEJMcp2032393

9. Spatial, temporal, and demographic patterns in prevalence of smoking tobacco use and attributable disease burden in 204 countries and territories, 1990-2019: a systematic analysis from the Global Burden of Disease Study 2019. *Lancet*. 2021;397:2337-60. doi: 10.1016/s0140-6736(21)01169-7

10. Prevention CfDca. National Health Interview Survey. 2017.

11. Prochaska JJ, Das S, Young-Wolf KCSmoking, Mental Illness, and Public Health. *Annual review of public health*. 2017;38:165-85. doi: 10.1146/annurev-publhealth-031816-044618

12. Wittenberg RE, Wolfman SL, De Biasi M, et alNicotinic acetylcholine receptors and nicotine addiction: A brief introduction. *Neuropharmacology*. 2020;177:108256. doi: 10.1016/j.neuropharm.2020.108256

13. Mineur YS, Soares AR, Etherington IM, et alPathophysiology of nAChRs: Limbic circuits and related disorders. *Pharmacological research*. 2023;191:106745. doi: 10.1016/j.phrs.2023.106745

14. Torti SV, Manz DH, Paul BT, et allron and Cancer. *Annual review of nutrition*. 2018;38:97-125. doi: 10.1146/annurev-nutr-082117-051732

15. Liang Y, Luo S, Wong THT, et alAssociation of iron homeostasis biomarkers in type 2 diabetes and glycaemic traits: a bidirectional two-sample Mendelian randomization study. *International journal of epidemiology*. 2023;52:1914-25. doi: 10.1093/ije/dyad093

16. Tan L, Zhou Q, Liu J, et alAssociation of iron status with non-alcoholic fatty liver disease and liver fibrosis in US adults: a cross-sectional study from NHANES 2017-2018. *Food & function*. 2023;14:5653-62. doi: 10.1039/d2fo04082d

17. Xu J, Zhang S, Tian Y, et al Genetic Causal Association between Iron Status and Osteoarthritis: A Two-Sample Mendelian Randomization. *Nutrients*. 2022;14. doi: 10.3390/nu14183683
18. Qiu J, Lian F, Fang X Iron status and mental disorders: A Mendelian randomization study. *Frontiers in nutrition*. 2022;9:1084860. doi: 10.3389/fnut.2022.1084860
19. Hare D, Ayton S, Bush A, et al A delicate balance: Iron metabolism and diseases of the brain. *Frontiers in aging neuroscience*. 2013;5:34. doi: 10.3389/fnagi.2013.00034
20. Shah HE, Bhawnani N, Ethirajulu A, et al Iron Deficiency-Induced Changes in the Hippocampus, Corpus Striatum, and Monoamines Levels That Lead to Anxiety, Depression, Sleep Disorders, and Psychotic Disorders. *Cureus*. 2021;13:e18138. doi: 10.7759/cureus.18138
21. Li Z, Li B, Song X, et al Dietary zinc and iron intake and risk of depression: A meta-analysis. *Psychiatry research*. 2017;251:41-7. doi: 10.1016/j.psychres.2017.02.006
22. Yao S, Zhong Y, Xu Y, et al Quantitative Susceptibility Mapping Reveals an Association between Brain Iron Load and Depression Severity. *Frontiers in human neuroscience*. 2017;11:442. doi: 10.3389/fnhum.2017.00442
23. Islam MR, Islam MR, Shalahuddin Qusar MMA, et al Alterations of serum macro-minerals and trace elements are associated with major depressive disorder: a case-control study. *BMC psychiatry*. 2018;18:94. doi: 10.1186/s12888-018-1685-z
24. McGrath J, Brown A, St Clair D Prevention and schizophrenia--the role of dietary factors. *Schizophrenia bulletin*. 2011;37:272-83. doi: 10.1093/schbul/sbq121
25. Galante J, Adamska L, Young A, et al The acceptability of repeat Internet-based hybrid



- diet assessment of previous 24-h dietary intake: administration of the Oxford WebQ in UK Biobank. *British Journal of Nutrition*. 2016;115:681-6. doi: 10.1017/S0007114515004821
26. Liu B, Young H, Crowe FL, et al Development and evaluation of the Oxford WebQ, a low-cost, web-based method for assessment of previous 24 h dietary intakes in large-scale prospective studies. *Public Health Nutrition*. 2011;14:1998-2005. doi: 10.1017/S1368980011000942
27. Perez-Cornago A, Pollard Z, Young H, et al Description of the updated nutrition calculation of the Oxford WebQ questionnaire and comparison with the previous version among 207,144 participants in UK Biobank. *European journal of nutrition*. 2021;60:4019-30. doi: 10.1007/s00394-021-02558-4
28. Xiang AH, Martinez MP, Chow T, et al Depression and Anxiety Among US Children and Young Adults. *JAMA network open*. 2024;7:e2436906. doi: 10.1001/jamanetworkopen.2024.36906
29. de Lima Queiroga L, Pitta RM, Ritti-Dias RM, et al Physical activity levels are associated with depressive symptoms: A cross-sectional study of 58,445 adults. *Journal of affective disorders*. 2024. doi: 10.1016/j.jad.2024.09.158
30. Dakanalis A, Mentzelou M, Papadopoulou SK, et al The Association of Emotional Eating with Overweight/Obesity, Depression, Anxiety/Stress, and Dietary Patterns: A Review of the Current Clinical Evidence. *Nutrients*. 2023;15. doi: 10.3390/nu15051173
31. Qi X, Jia Y, Pan C, et al Index of multiple deprivation contributed to common psychiatric disorders: A systematic review and comprehensive analysis. *Neuroscience and biobehavioral reviews*. 2022;140:104806. doi: 10.1016/j.neubiorev.2022.104806

32. Wang G, Sabran K Assessing depression and anxiety among young adults after epidemics and pandemics: a cross-sectional study in Anyang, China. *Sci Rep.* 2024;14:2759. doi: 10.1038/s41598-024-53292-w
33. Lee SK, Kwon YJ Socioeconomic disparities in alcohol-related depression: a national cohort study of low-income medical aid beneficiaries and national health insurance beneficiaries in Korea. *BMC public health.* 2024;24:2189. doi: 10.1186/s12889-024-19665-6
34. Menzies V, Webb F, Lyon DE, et al Anxiety and depression among individuals with long COVID: Associations with social vulnerabilities. *Journal of affective disorders.* 2024;367:286-96. doi: 10.1016/j.jad.2024.08.214
35. Huang H, Meng F, Qi Y, et al Association of hypertension and depression with mortality: an exploratory study with interaction and mediation models. *BMC public health.* 2024;24:1068. doi: 10.1186/s12889-024-18548-0
36. Chieh A, Chu J, Wallace LA, et al Depression prevalence, screening, and treatment in adult outpatients with type 1 and type 2 diabetes: A nationally representative cross-sectional study (National Ambulatory Medical Care Survey 2014-2019). *Journal of affective disorders.* 2024;368:471-6. doi: 10.1016/j.jad.2024.09.088
37. Cassidy S, Chau JY, Catt M, et al Cross-sectional study of diet, physical activity, television viewing and sleep duration in 233,110 adults from the UK Biobank; the behavioural phenotype of cardiovascular disease and type 2 diabetes. *BMJ open.* 2016;6:e010038. doi: 10.1136/bmjopen-2015-010038
38. Liu S, Chen J, Guan L, et al The brain, rapid eye movement sleep, and major depressive disorder: A multimodal neuroimaging study. *Progress in neuro-psychopharmacology &*

- biological psychiatry. 2024;136:111151. doi: 10.1016/j.pnpbp.2024.111151
39. Chen MH, Su TP, Chen YS, et al Association between psychiatric disorders and iron deficiency anemia among children and adolescents: a nationwide population-based study. BMC psychiatry. 2013;13:161. doi: 10.1186/1471-244x-13-161
40. Stewart R, Hirani V Relationship Between Depressive Symptoms, Anemia, and Iron Status in Older Residents From a National Survey Population. 2012;74:208-13. doi: 10.1097/PSY.0b013e3182414f7d
41. Lee HS, Chao HH, Huang WT, et al Psychiatric disorders risk in patients with iron deficiency anemia and association with iron supplementation medications: a nationwide database analysis. BMC psychiatry. 2020;20:216. doi: 10.1186/s12888-020-02621-0
42. Beard JL, Erikson KM, Jones BC Neurobehavioral analysis of developmental iron deficiency in rats. Behavioural brain research. 2002;134:517-24. doi: 10.1016/s0166-4328(02)00092-x
43. Benowitz NL Nicotine addiction. The New England journal of medicine. 2010;362:2295-303. doi: 10.1056/NEJMra0809890
44. Beebe R, Myers J. Professional Paramedic, Volume I: Foundations of Paramedic Care: Cengage Learning; 2012.
45. Bullen CE Electronic cigarettes for smoking cessation. Current cardiology reports. 2014;16:538. doi: 10.1007/s11886-014-0538-8
46. Republished: Nicotine and health. BMJ (Clinical research ed). 2014;349:2014.7.0264rep. doi: 10.1136/bmj.2014.7.0264rep
47. Martin-Soelch C Neuroadaptive changes associated with smoking: structural and

functional neural changes in nicotine dependence. *Brain sciences*. 2013;3:159-76. doi:

10.3390/brainsci3010159

48. Burhans MS, Dailey C, Beard Z, et al Iron deficiency: differential effects on monoamine transporters. *Nutritional neuroscience*. 2005;8:31-8. doi: 10.1080/10284150500047070

49. Youdim MB, Ben-Shachar D, Yehuda S Putative biological mechanisms of the effect of iron deficiency on brain biochemistry and behavior. *The American journal of clinical nutrition*. 1989;50:607-15; discussion 15-7. doi: 10.1093/ajcn/50.3.607

50. Daubner SC, Le T, Wang S Tyrosine hydroxylase and regulation of dopamine synthesis. *Archives of biochemistry and biophysics*. 2011;508:1-12. doi: 10.1016/j.abb.2010.12.017

51. Tekin I, Roskoski R, Jr., Carkaci-Salli N, et al Complex molecular regulation of tyrosine hydroxylase. *Journal of neural transmission (Vienna, Austria : 1996)*. 2014;121:1451-81. doi: 10.1007/s00702-014-1238-7

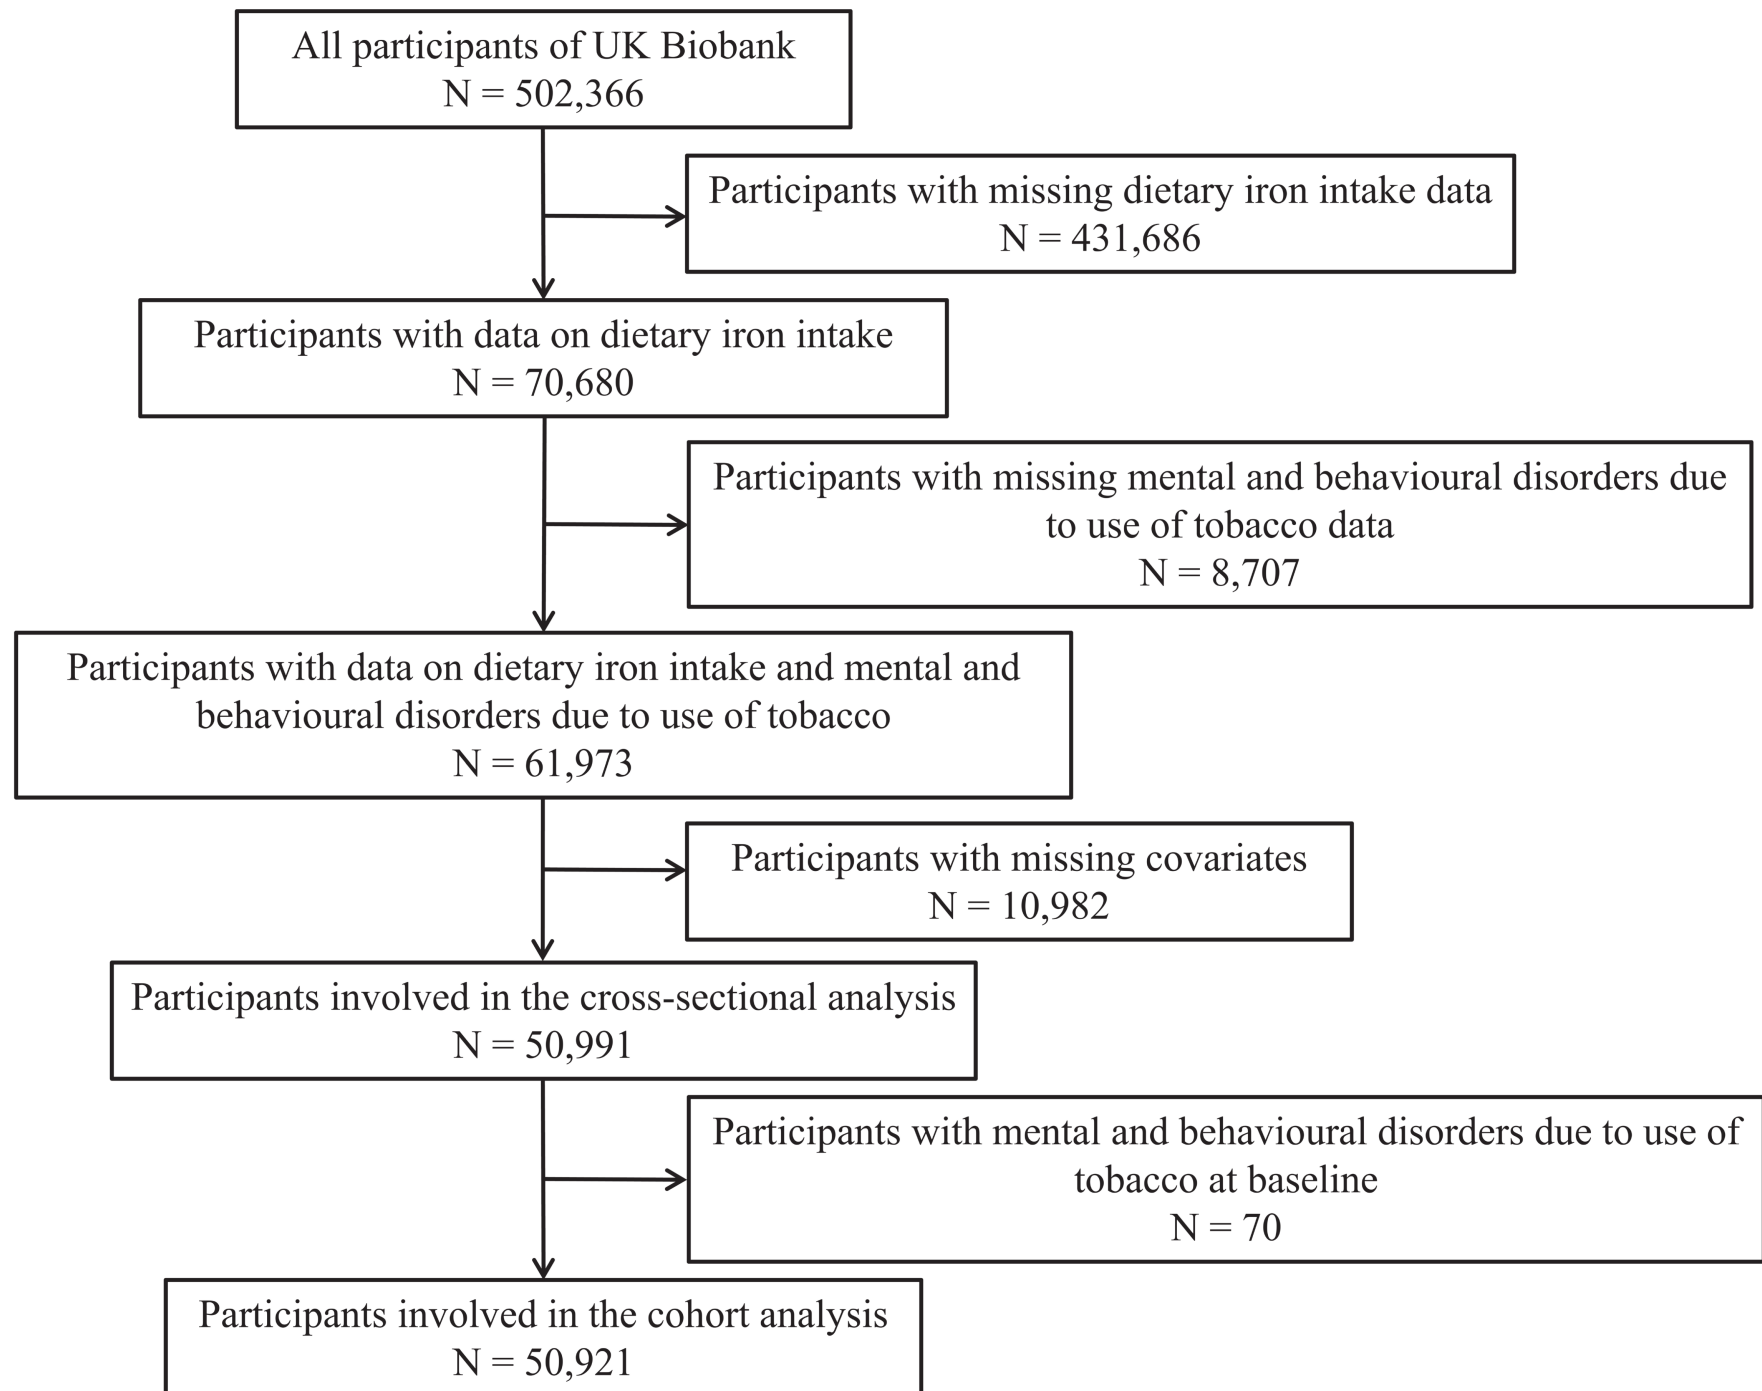

Figure 1 Flow diagram of study participant selection.

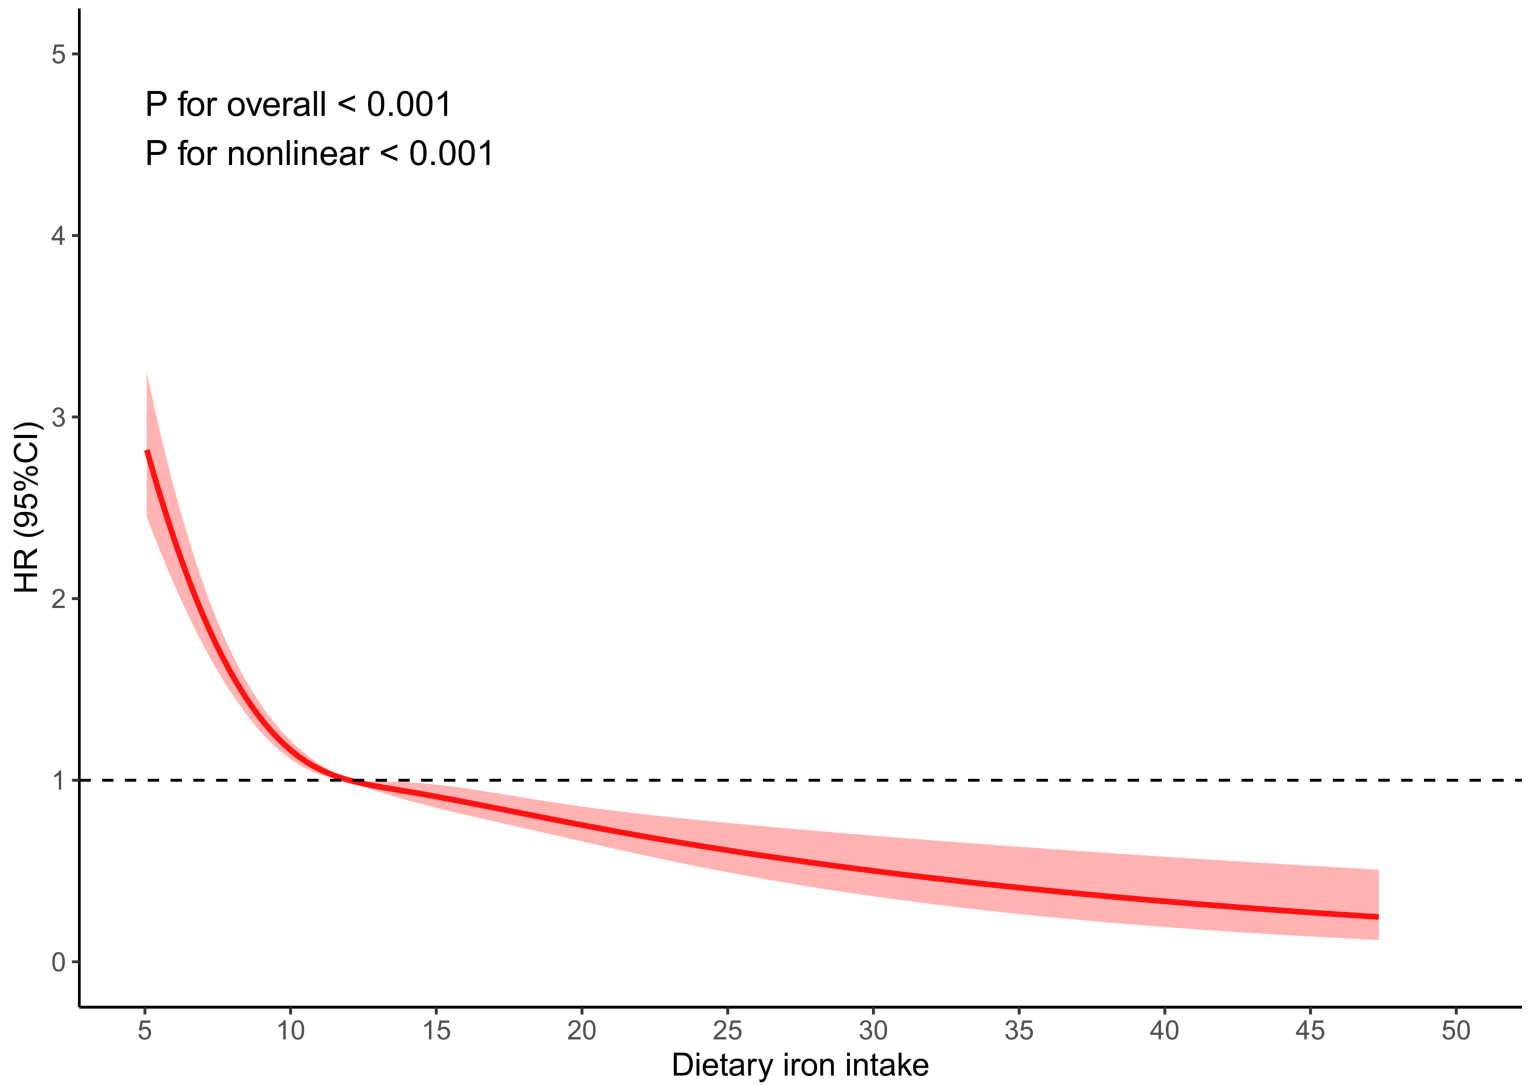

Figure 2 Restricted cubic spline plots of dietary iron intake and mental and behavioral disorders due to use of tobacco.
